# Supplementary material for: Investigation of the Optimal Prime Boost Spacing Regimen for A Cancer Therapeutic Vaccine Targeting Human Papillomavirus
Source: Preprints.org preprint supplement (doi:10.20944/preprints202207.0206.v1), 2022-07-14
Supplement: Supplementary file 1 [file supplementary]

**Percent tumor free mice after therapeutic vaccination**

| Group      | Day 10 | 13    | 16     | 20     | 23     | 26     | 30     |
|------------|--------|-------|--------|--------|--------|--------|--------|
| 28 Day Vax | 40.0%  | 80.0% | 100.0% | 100.0% | 100.0% | 100.0% | 100.0% |
| 21 Day Vax | 50.0%  | 70.0% | 90.0%  | 90.0%  | 90.0%  | 90.0%  | 90.0%  |
| 14 Day Vax | 40.0%  | 60.0% | 70.0%  | 90.0%  | 90.0%  | 90.0%  | 90.0%  |
| 7 Day Vax  | 60.0%  | 50.0% | 80.0%  | 100.0% | 100.0% | 100.0% | 100.0% |
| 3 Day Vax  | 20.0%  | 50.0% | 100.0% | 100.0% | 100.0% | 100.0% | 100.0% |
| 1 Day Vax  | 90.0%  | 80.0% | 90.0%  | 100.0% | 100.0% | 100.0% | 100.0% |
| Naive      | 30.0%  | 0.0%  | 0.0%   | 0.0%   | 0.0%   | 0.0%   | 0.0%   |

[illegible]
